# Supplementary material
Source: PubMed Central journal article supplement (PMC7855500)
Supplement: NIHMS1628027-supplement-Supp_info.pdf [file NIHMS1628027-supplement-Supp_info.pdf]

## Supplemental Information

### TET1 promotes the malignant progression of cholangiocarcinoma with IDH1 wild-type

| Gene name     | Species             | Forward primer         | Reverse primer              |
|---------------|---------------------|------------------------|-----------------------------|
| CDK4          | <i>Homo sapiens</i> | ATGGCTACCTCTCGATATGAGC | CATTGGGGACTCTCACACTCT       |
| CDKN1a        | <i>Homo sapiens</i> | GCAGACCAGCATGACAGATT   | CTTCCTGTGGGCGGATTAG         |
| CDKN2b        | <i>Homo sapiens</i> | TAGTGGAGAAGGTGCGACA    | CCATCATCATGACCTGGATCG       |
| GAPDH         | <i>Homo sapiens</i> | GGTCGGAGTCAACGGATTT    | GATGGCAACAATATCCACTTTACC    |
| CCND1         | <i>Homo sapiens</i> | CCTCGGTGTCCTACTTCAAATG | CACTTCTGTTCTCGCAGAC         |
| CCNE1         | <i>Homo sapiens</i> | GTACTGAGCTGGGCAAATAGAG | GAAGAGGGTGTTGCTCAAGAA       |
| CDKN2c        | <i>Homo sapiens</i> | GGGGACCTAGAGCAACTTACT  | CAGCGCAGTCCTTCCAAAT         |
| Cdc25a        | <i>Homo sapiens</i> | CTCCTCCGAGTCAACAGATTCA | CAACAGCTTCTGAGGTAGGGA       |
| BAK           | <i>Homo sapiens</i> | GTTTTCCGCAGCTACGTTTTT  | GCAGAGGTAAGGTGACCATCTC      |
| BIK           | <i>Homo sapiens</i> | GACCTGGACCCTATGGAGGAC  | CCTCAGTCTGGTCGTAGATGA       |
| HRK           | <i>Homo sapiens</i> | GGCAGGCGGAACTTGTAGGAC  | TCCAGGCGCTGTCTTTACTCTCC     |
| <b>Bcl2</b>   | <i>Homo sapiens</i> | GGTGGGGTCATGTGTGTGG    | CGGTTTCAGGTAAGTACTCAGTCATCC |
| <b>Bcl-XL</b> | <i>Homo sapiens</i> | GAGCTGGTGGTTGACTTTCTC  | TCCATCTCCGATTCAAGTCCCT      |

**Supplemental Table 1.** Primers used in this study.

| Gene1   | Gene2   | Correlation | p-value  |
|---------|---------|-------------|----------|
| TET1    | TP53    | 0.501416    | 0.001837 |
| TET1    | IDH1    | 0.033104    | 0.848002 |
| TP53    | IDH1    | 0.121159    | 0.481497 |
| TET1    | IDH2    | -0.07955    | 0.644681 |
| TP53    | IDH2    | -0.05069    | 0.769076 |
| IDH1    | IDH2    | 0.234794    | 0.168078 |
| TET1    | TP53mut | -0.17063    | 0.319741 |
| TP53    | TP53mut | -0.07258    | 0.674008 |
| IDH1    | TP53mut | 0.210263    | 0.218372 |
| IDH2    | TP53mut | -0.19552    | 0.253127 |
| TET1    | IDH1mut | -0.16418    | 0.338642 |
| TP53    | IDH1mut | -0.12237    | 0.477089 |
| IDH1    | IDH1mut | 0.036271    | 0.833656 |
| IDH2    | IDH1mut | 0.240483    | 0.157712 |
| TP53mut | IDH1mut | -0.12109    | 0.481748 |
| TET1    | IDH2mut | -0.11978    | 0.486545 |
| TP53    | IDH2mut | 0.049861    | 0.772745 |
| IDH1    | IDH2mut | -0.0462     | 0.789024 |
| IDH2    | IDH2mut | 0.078675    | 0.648318 |
| TP53mut | IDH2mut | -0.05096    | 0.76785  |
| IDH1mut | IDH2mut | -0.06788    | 0.694034 |

**Supplemental table 2.** Correlation analysis for TCGA-CHOL dataset.

| Gene1 | Gene2 | Correlation | p-value  |
|-------|-------|-------------|----------|
| TET1  | TP53  | 0.17646     | 0.092445 |
| TET1  | IDH1  | -0.00973    | 0.926624 |
| TP53  | IDH1  | 0.032646    | 0.757377 |
| TET1  | IDH2  | 0.069563    | 0.509959 |
| TP53  | IDH2  | 0.132225    | 0.208955 |
| IDH1  | IDH2  | 0.349778    | 0.000631 |

**Supplemental Table 3.** Correlation analysis for GSE76297 dataset.

| Gene 1 | Gene 2 | Correlation | p-value  |
|--------|--------|-------------|----------|
| TET1   | TP53   | 0.208656    | 0.164043 |
| TET1   | IDH1   | -0.21907    | 0.143543 |
| TP53   | IDH1   | -0.03713    | 0.806471 |
| TET1   | IDH2   | -0.18427    | 0.220223 |
| TP53   | IDH2   | 0.066902    | 0.658662 |
| IDH1   | IDH2   | -0.13035    | 0.387894 |

**Supplemental Table 4.** Correlation analysis for GSE89747dataset.

| Gene1      | Gene2 | Correlation | p-value  |
|------------|-------|-------------|----------|
| TET1/CXXC6 | IDH1  | -0.03822    | 0.691792 |
| TET1/CXXC6 | IDH2  | 0.196957    | 0.039174 |
| IDH1       | IDH2  | 0.399921    | 1.50E-05 |
| CXXC6      | TP53  | -0.03325    | 0.730235 |
| IDH1       | TP53  | -0.01272    | 0.895091 |
| IDH2       | TP53  | -0.0129     | 0.893604 |

**Supplemental Table 5.** Correlation analysis for GSE266566 dataset.

| NAME                          | SIZE | ES       | NES      | p-value  |
|-------------------------------|------|----------|----------|----------|
| KEGG_NOTCH_SIGNALING_PATHWAY  | 47   | 0.610762 | 1.840032 | <0.0001  |
| KEGG_THYROID_CANCER           | 29   | 0.45638  | 1.54861  | 0.022403 |
| KEGG_SMALL_CELL_LUNG_CANCER   | 84   | 0.448934 | 1.517881 | 0.026369 |
| KEGG_CHRONIC_MYELOID_LEUKEMIA | 73   | 0.451787 | 1.467951 | 0.033465 |
| KEGG_GLIOMA                   | 65   | 0.414158 | 1.467408 | 0.036957 |
| KEGG_PROSTATE_CANCER          | 89   | 0.400254 | 1.463823 | 0.02045  |
| KEGG_RNA_DEGRADATION          | 57   | 0.492549 | 1.459486 | 0.046512 |
| KEGG_ERBB_SIGNALING_PATHWAY   | 87   | 0.414868 | 1.45225  | 0.036437 |

**Supplemental Table 6.** Enriched KEGG pathways in TET1 high versus TET1 low TCGA-CHOL samples. Size indicates how many genes have been involved in the pathway. ES, enrichment score; NES, normalized enrichment score.

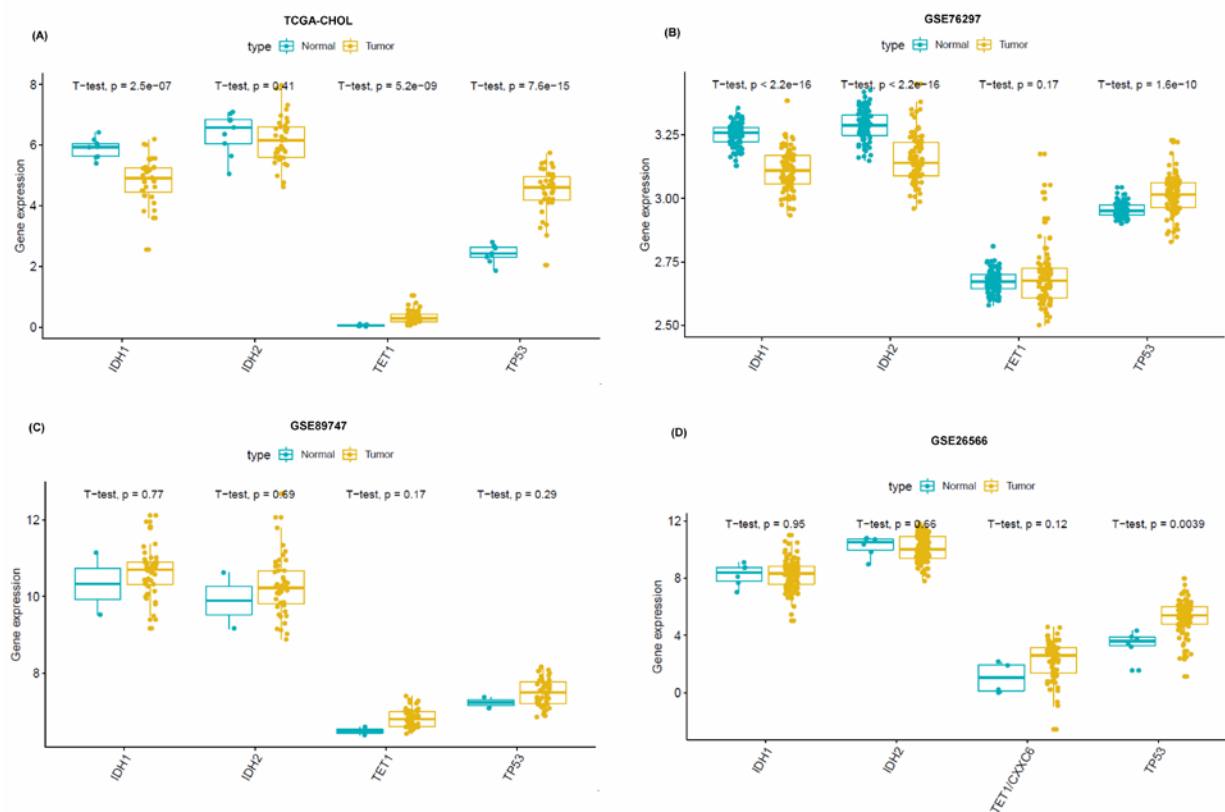

**Supplemental Figure 1.** The mRNA expression levels of IDH1, IDH2, TET1, and TP53 were analyzed in different datasets including TCGA-CHOL, GSE76297, GSE89747, and GSE26566.

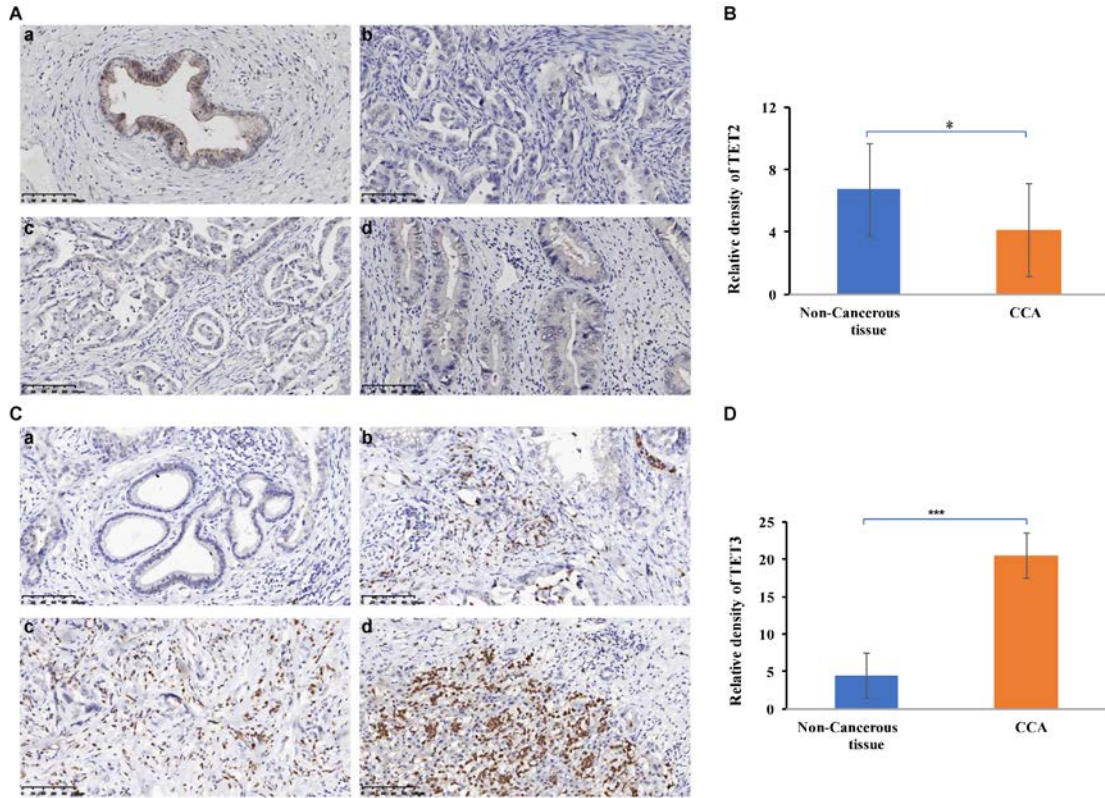

**Supplemental Figure 2.** The results of TET2 and TET3 protein expression levels in non-cancerous biliary and CCA tissues. (A) The representative IHC images of TET2 in non-cancerous (a) and CCA (b-d) were shown. (B) Quantification of TET2 IHC results. (C) The representative IHC images of TET3 in non-cancerous (a) and CCA (b-d) were shown. (D) Quantification data of TET3 IHC results. \*,  $p < 0.05$ ; \*\*\*,  $p < 0.001$ , when compared with control,  $n = 12$  in non-cancerous group and  $n = 91$  in CCA group.

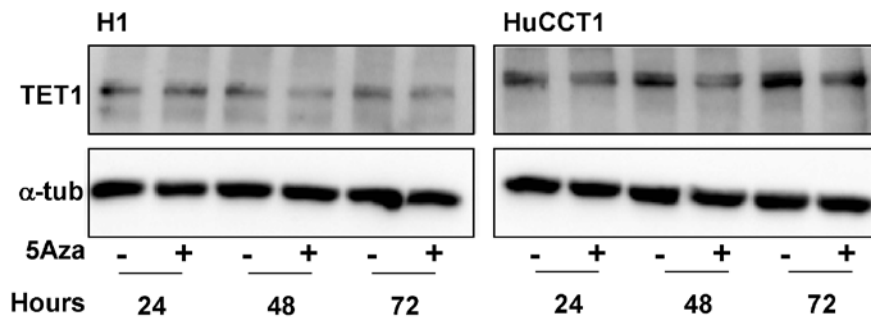

**Supplemental Figure 3.** TET1 protein expression in H1 and HuCCT1 treated with DNA methylation inhibitor, 5-Aza for 24, 48, and 72 hours.  $\alpha$ -Tubulin served as loading control.

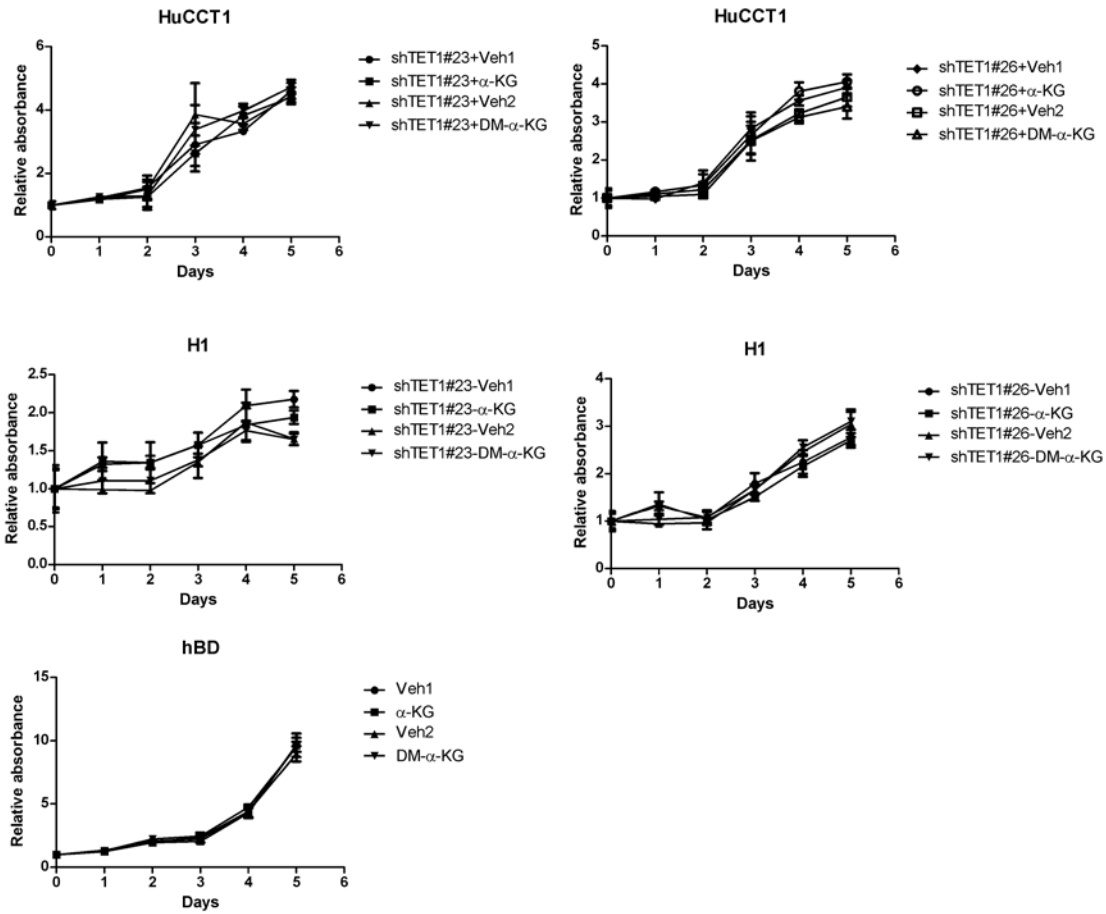

**Supplemental Figure 4.** MTT results of H1, HuCCT1, and hBD cells. Relative cell growth rates were determined in H1-shTET1#23, H1-shTET1#26, HuCCT1-shTET1#23, HuCCT1-shTET1#26, and hBD cells treated with vehicle #1 (veh1, H<sub>2</sub>O), α-KG, vehicle #2 (veh2, DMSO), and DM-α-KG for 1, 2, 3, 4, 5 days, n=8.



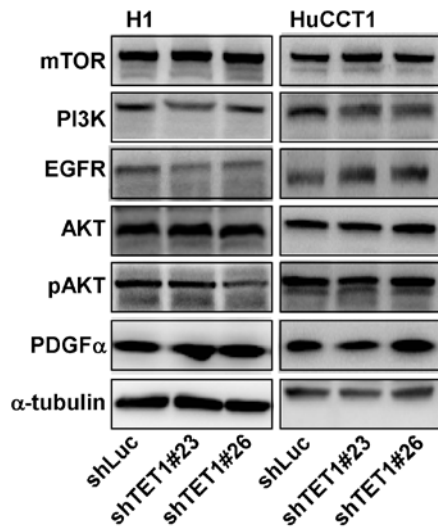

**Supplemental Figure 5.** The impact of TET1 down-regulation on oncogenic pathways in CCA cells. The protein expression levels of mTOR, PI3K, EGFR, Akt, phosphor-Akt (pAkt) PDGF $\alpha$ , and  $\alpha$ -tubulin were determined in H1 and HuCCT1 cells treated with shLuc, shTET1#23, and shTET1#26.

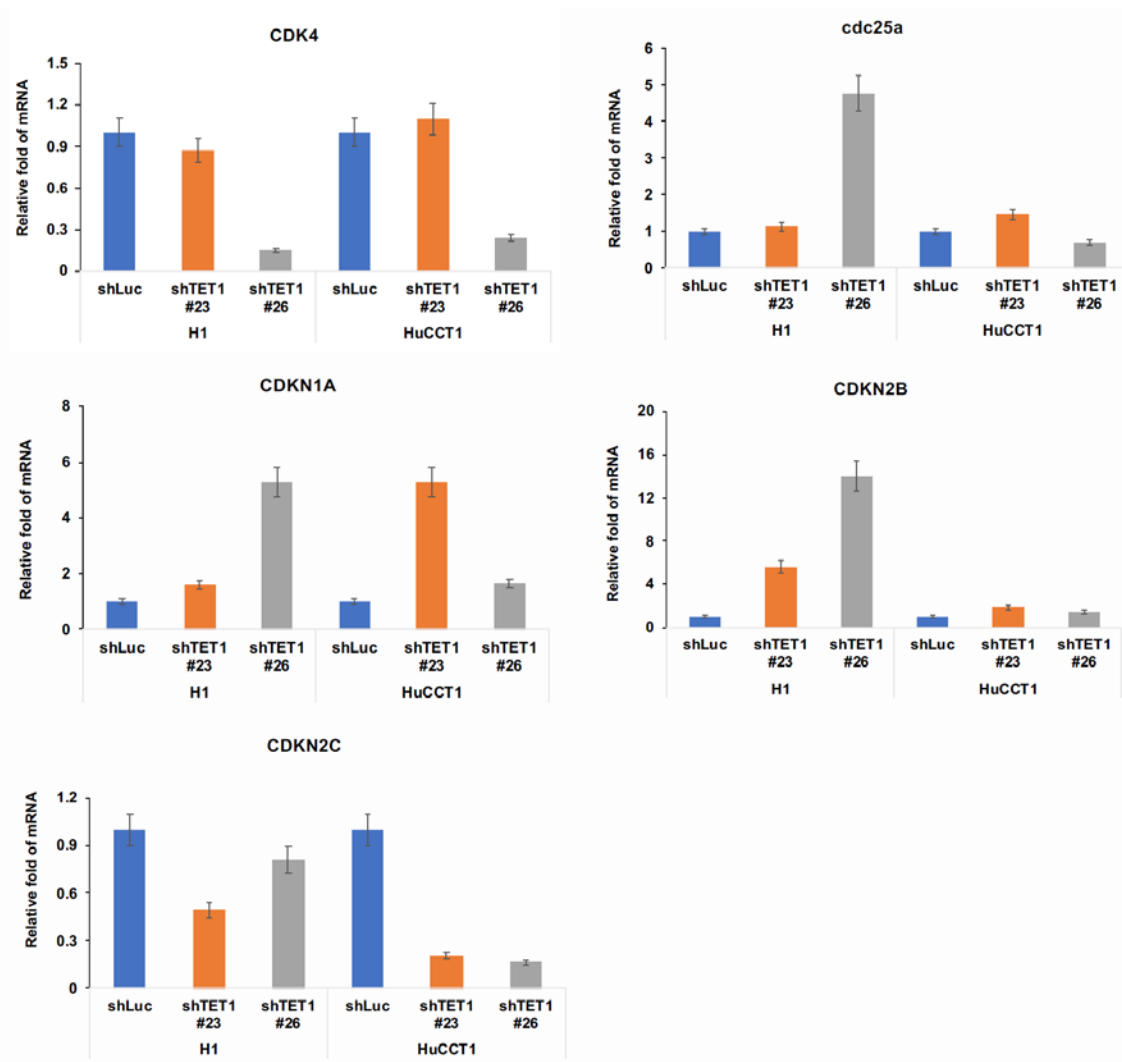

**Supplemental Figure 6.** The expression levels of cell cycle associated genes, including CDKN2c, CDK4, cdc25a, CDKN1A, and CDKN1B, n=6.

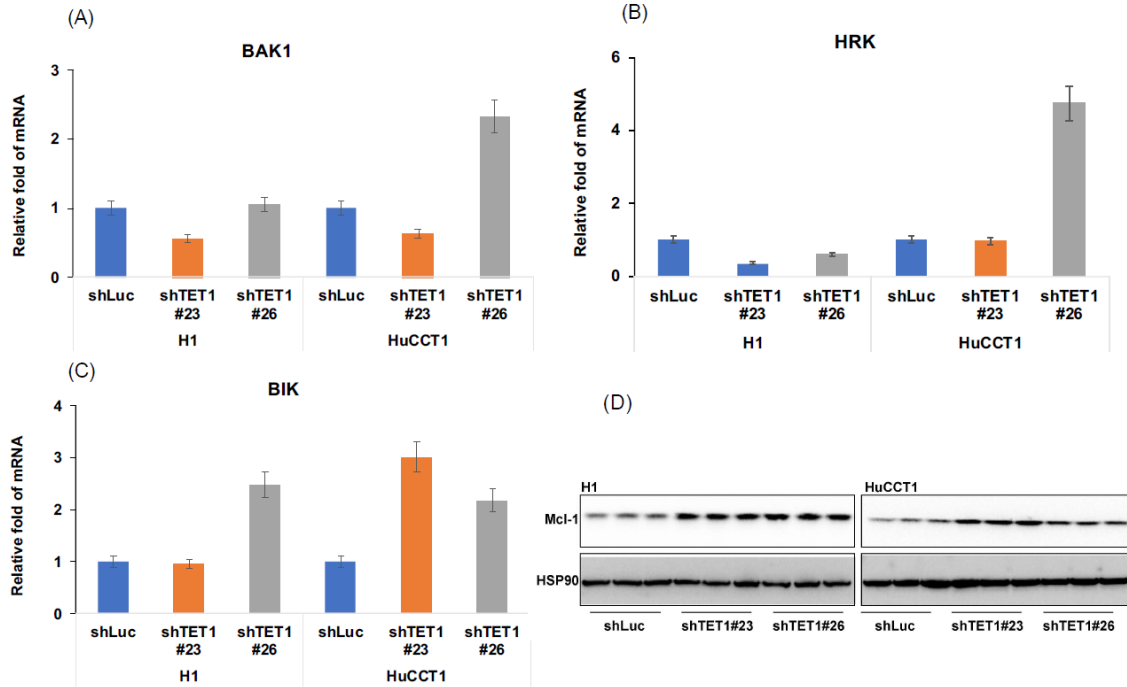

**Supplemental Figure 7.** The mRNA expression of pro-apoptotic genes, including (A) HRK, (B) BIK and (C) BAK were determined, n=6. (D) The protein expression of Mcl-1 was examined in H1 and HuCCT1 cells treated as indicated.

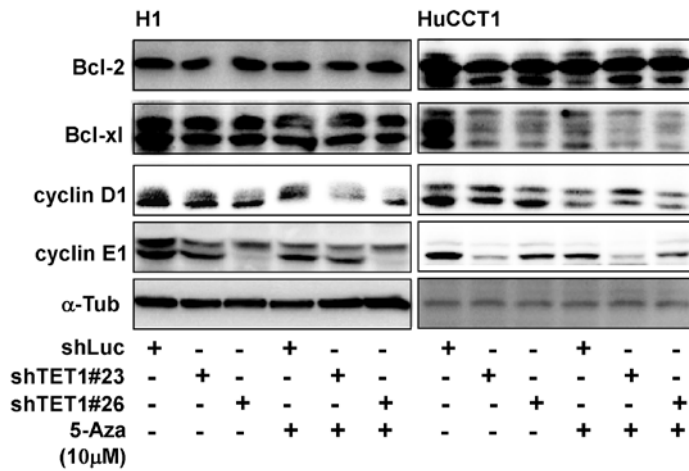

**Supplemental Figure 8.** Western blotting results of Bcl-2, Bcl-xl, cyclin D1, and cyclin E1 in H1 and HuCCT1 CCA cells. The protein expression levels of Bcl-2, Bcl-xl, cyclin D1, cyclin E1, and a-Tub were determined in H1-shLuc, H1-shTET1#23, H1-shTET1#26, HuCCT1-shLuc, HuCCT1-shTET1#23, and HuCCT1-shTET1#26 treated with DMSO or 10μM 5-Aza for 48 hours.

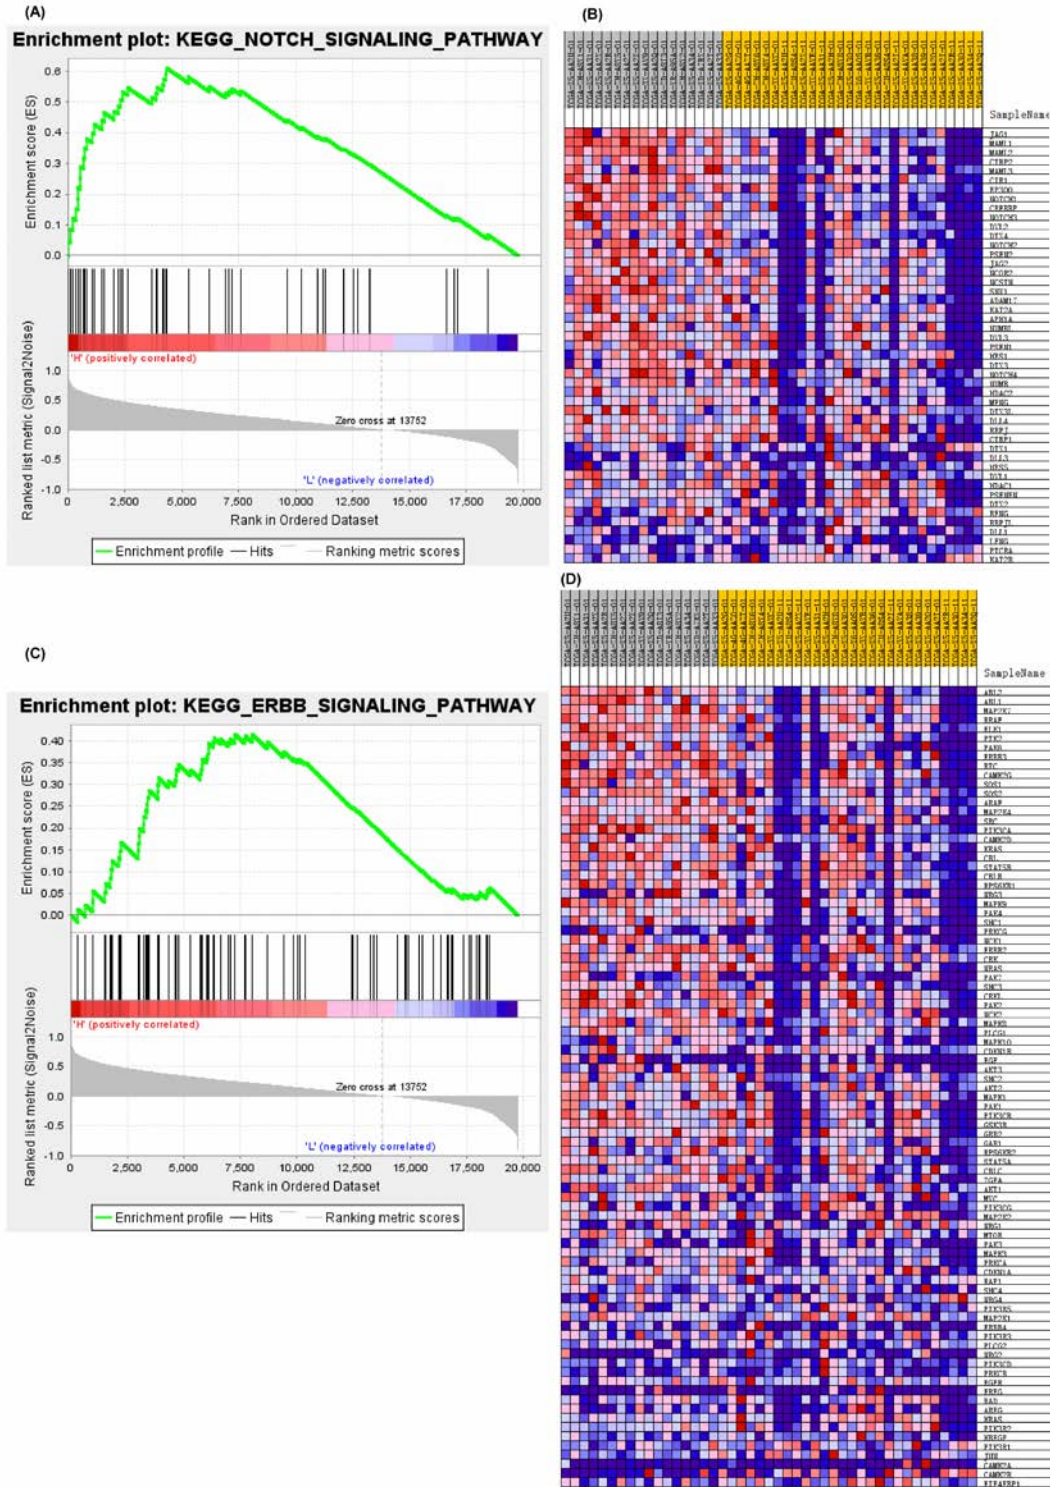

**Supplemental Figure 9.** Notch and ERbB signaling pathways are associated with TET1 expression in CCA tumors. Enrichment plots of (A) Notch signaling pathway and (C) ErbB signaling in TET1 high versus TET1 low CCA tumors. Heatmaps of (B) Notch and (D) ErbB signaling pathways associated molecules in TET1 high (Gray color) and TET1 low (orange color).

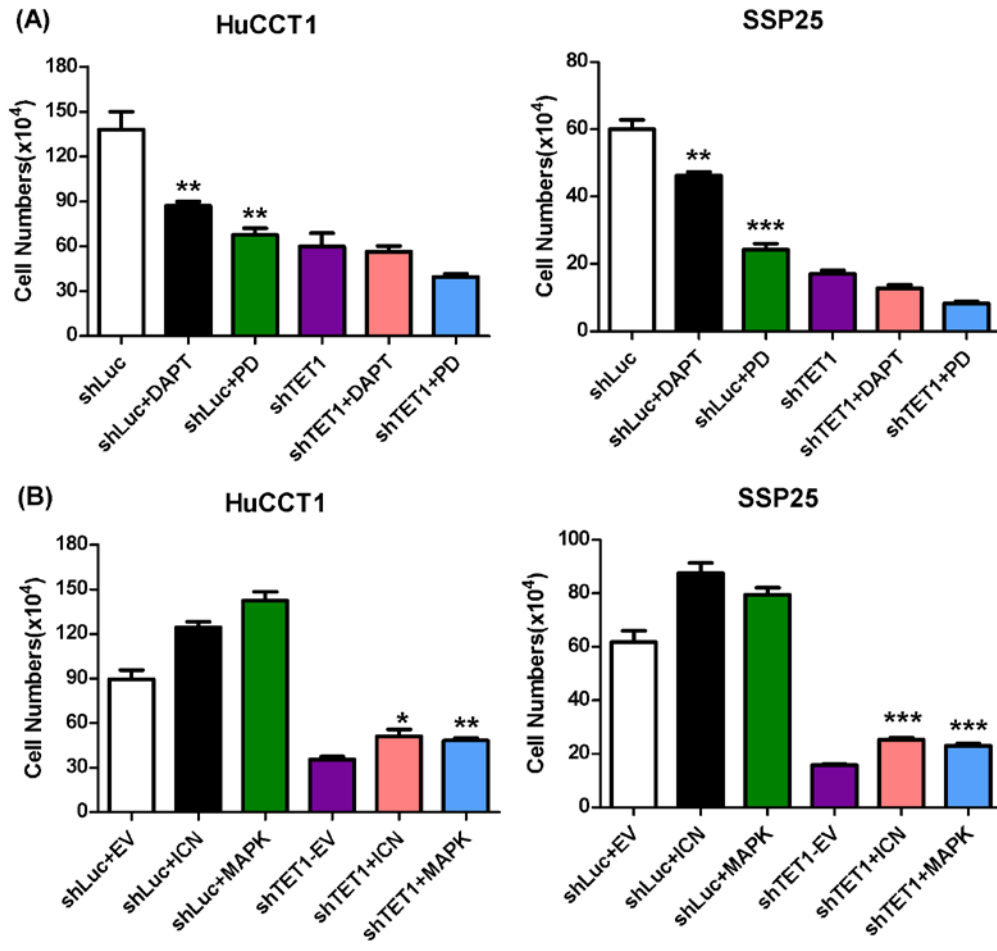

**Supplemental Figure 10.** Involvement of Notch1 and MAPK in TET1-mediated CCA cell growth. (A) Cell numbers were counted in HuCCT1 and SSP25 CCA cells transduced with shLuc, shTET1#23, and shTET1#26 in the presence of DMSO, 10 $\mu$ M DAPT, or 10 $\mu$ M PD98059 (PD) for 5 days. (B) Cell numbers were determined in HuCCT1 and SSP25 cells transduced with shLuc, shTET1#23, and shTET1#26 in the presence of empty vector, Notch1 intracellular domain, or MAPK transfection for 7 days. N=3 per group. \*\*, p<0.01; \*\*\*, p<0.001 when compared with relevant controls.
